# Supplementary material for: The palladium-catalyzed desulfitative cyanation of arenesulfonyl chlorides and sodium sulfinates
Source: Royal Society of Chemistry journal article supplement (doi:10.1039/c1cc16134b), 2011-11-11

# Supporting Information

## The palladium-catalyzed desulfitative cyanation of arenesulfonyl chlorides and sodium sulfinates

Jianbin Chen, Yang Sun, Bin Liu, Dongfang Liu and Jiang Cheng\*

College of Chemistry & Materials Engineering, Wenzhou University, Wenzhou 325027,  
P. R. China

*E-mail:* [jiangcheng@wzu.edu.cn](mailto:jiangcheng@wzu.edu.cn)

### Table of Contents

|                                                                                                 |               |
|-------------------------------------------------------------------------------------------------|---------------|
| <b>1. General experimental details</b>                                                          | <b>S 2</b>    |
| <b>2. Spectral data for the products</b>                                                        | <b>S 3-4</b>  |
| <b>3. References</b>                                                                            | <b>S 5</b>    |
| <b>4. Copies of the products <math>^1\text{H}</math> NMR and <math>^{13}\text{C}</math> NMR</b> | <b>S 6-16</b> |

## 1. General experimental details:

Chemicals were either purchased or purified by standard techniques without special instructions.  $^1\text{H}$  NMR and  $^{13}\text{C}$  NMR spectra were measured on a Bruker 500 MHz spectrometer ( $^1\text{H}$  500 MHz and  $^{13}\text{C}$  125 MHz), using  $\text{CDCl}_3$  or  $\text{DMSO-d}_6$  as the solvent at room temperature. Chemical shifts were quoted in parts per million (ppm) referenced to the appropriate solvent peak or 0.0 ppm for tetramethylsilane. The following abbreviations were used to describe peak splitting patterns when appropriate: s = singlet, d = doublet, t = triplet. Coupling constants  $J$ , were reported in hertz unit (Hz). Chemical shifts (in ppm) were referenced to tetramethylsilane ( $\delta = 0$  ppm) in  $\text{CDCl}_3$  as an internal standard.  $^{13}\text{C}$  NMR spectra were obtained by using the same NMR spectrometers and chemical shifts were reported in ppm referenced to the center line of a triplet at 77.0 ppm of  $\text{CDCl}_3$  or 39.5 ppm of  $\text{DMSO-d}_6$ .

*Caution: Work with cyanides is hazardous; the experiments and work-up need to be carried out in a well-ventilated fume-hood.*

Dry 1,4-dioxane: After heated with sodium wire for several hours, dry 1,4-dioxane was gathered by distill.

**Typical experimental procedures for the reaction of arenesulfonyl chlorides and sodium sulfinates:** In a sealed tube, 2.0 mL of dry 1,4-dioxane was added to a mixture of arenesulfonyl chlorides **1** or aryl sodium sulfinates **1'** (0.2 mmol, 1.0 equiv), CuCN (18.9 mg, 0.21 mmol, 1.05 equiv),  $\text{Pd}(\text{CH}_3\text{CN})_2\text{Cl}_2$  (5.1 mg, 0.02 mmol, 0.1 equiv),  $\text{Cu}(\text{acac})_2$  (10.5 mg, 0.04 mmol, 0.2 equiv) and  $\text{Na}_2\text{CO}_3$  (42.4 mg, 0.4 mmol, 2.0 equiv) under air. The tube was sealed with a Teflon lined cap and the reaction mixture was stirred at 130 °C for 24 h. After cooling to room temperature, the resultant mixture was evaporated with EtOAc (2 x 25 mL) under reduced pressure and the residue was purified by flash column chromatography on a silica gel to give the products.

## 2. Spectral data for the products:

### 4-methoxybenzonitrile (2a)<sup>1</sup>

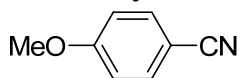

<sup>1</sup>H NMR (CDCl<sub>3</sub>, 500 MHz): δ 7.58 (d, *J* = 9.0 Hz, 2H), 6.95 (d, *J* = 9.0 Hz, 2H), 3.86 (s, 3H).

<sup>13</sup>C NMR (CDCl<sub>3</sub>, 125 MHz): δ 162.8, 134.0, 119.2, 114.7, 104.0, 55.5.

### 4-methylbenzonitrile (2b)<sup>4</sup>

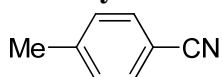

<sup>1</sup>H NMR (CDCl<sub>3</sub>, 500 MHz): δ 7.39 (d, *J* = 8.0 Hz, 2H), 7.14 (d, *J* = 8.0 Hz, 2H), 2.29 (s, 3H).

<sup>13</sup>C NMR (CDCl<sub>3</sub>, 125 MHz): δ 143.5, 131.7, 129.6, 118.8, 109.0, 21.5.

### 4-tert-butylbenzonitrile (2c)<sup>5</sup>

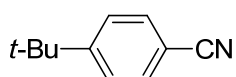

<sup>1</sup>H NMR (CDCl<sub>3</sub>, 500 MHz): δ 7.58 (d, *J* = 8.0 Hz, 2H), 7.48 (d, *J* = 8.0 Hz, 2H), 1.32 (s, 9H).

<sup>13</sup>C NMR (CDCl<sub>3</sub>, 125 MHz): δ 156.6, 131.9, 126.1, 119.1, 109.2, 35.2, 30.9.

### biphenyl-4-carbonitrile (2d)<sup>1</sup>

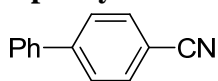

<sup>1</sup>H NMR (CDCl<sub>3</sub>, 500 MHz): δ 7.74-7.68 (m, 4H), 7.60 (d, *J* = 8.0 Hz, 2H), 7.50-7.49 (m, 2H), 7.47-7.43 (m, 1H).

<sup>13</sup>C NMR (CDCl<sub>3</sub>, 125 MHz): δ 145.6, 139.1, 132.5, 129.1, 128.6, 127.7, 127.2, 118.9, 110.9.

### 4-chlorobenzonitrile (2e)<sup>2</sup>

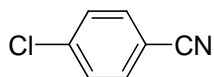

<sup>1</sup>H NMR (CDCl<sub>3</sub>, 500 MHz): δ 7.59 (d, *J* = 8.5 Hz, 2H), 7.46 (d, *J* = 8.5 Hz, 2H).

<sup>13</sup>C NMR (CDCl<sub>3</sub>, 125 MHz): δ 139.5, 133.3, 129.6, 117.9, 110.8.

### 4-bromobenzonitrile (2f)<sup>3</sup>

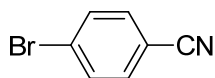

<sup>1</sup>H NMR (CDCl<sub>3</sub>, 500 MHz): δ 7.62 (d, *J* = 8.5 Hz, 2H), 7.51 (d, *J* = 8.5 Hz, 2H).

<sup>13</sup>C NMR (CDCl<sub>3</sub>, 125 MHz): δ 133.3, 132.5, 127.9, 117.9, 111.1.

### 4-nitrobenzonitrile (2g)<sup>4</sup>

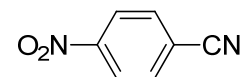

<sup>1</sup>H NMR (CDCl<sub>3</sub>, 500 MHz): δ 8.36 (d, *J* = 8.5 Hz, 2H), 7.89 (d, *J* = 8.5 Hz, 2H).

$^{13}\text{C}$  NMR ( $\text{CDCl}_3$ , 125 MHz):  $\delta$  150.0, 133.5, 124.3, 118.3, 116.8.

**3-nitrobenzonitrile (2h<sup>2</sup>)**

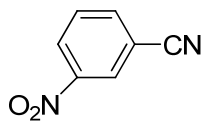

$^1\text{H}$  NMR ( $\text{CDCl}_3$ , 500 MHz):  $\delta$  8.54-8.53 (m, 1H), 8.53-8.47 (m, 1H), 8.01-7.99 (m, 1H), 7.76-7.73 (m, 1H).

$^{13}\text{C}$  NMR ( $\text{CDCl}_3$ , 125 MHz):  $\delta$  148.3, 137.6, 130.7, 127.5, 127.2, 116.5, 114.2.

**4-acetylbenzonitrile (2i)<sup>1</sup>**

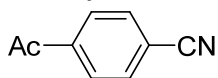

$^1\text{H}$  NMR ( $\text{CDCl}_3$ , 500 MHz):  $\delta$  8.03 (d,  $J$  = 8.5 Hz, 2H), 7.77 (d,  $J$  = 8.5 Hz, 2H), 2.64 (s, 3H).

$^{13}\text{C}$  NMR ( $\text{CDCl}_3$ , 125 MHz):  $\delta$  196.5, 139.9, 132.5, 128.7, 117.9, 116.4, 26.7.

**N-(4-cyanophenyl)acetamide (2j)<sup>3</sup>**

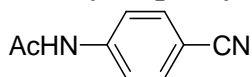

$^1\text{H}$  NMR ( $\text{DMSO-d}_6$ , 500 MHz):  $\delta$  10.42 (s, 1H), 7.72 (s, 4H), 2.07 (s, 3H).

$^{13}\text{C}$  NMR ( $\text{DMSO-d}_6$ , 125 MHz):  $\delta$  169.8, 143.6, 133.5, 119.4, 119.3, 105.1, 24.4.

**2-naphthonitrile (2k)<sup>1</sup>**

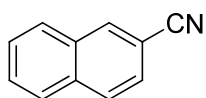

$^1\text{H}$  NMR ( $\text{CDCl}_3$ , 500 MHz):  $\delta$  8.23 (s 1H), 7.92-7.88 (m, 3H), 7.66-7.59 (m, 3H).

$^{13}\text{C}$  NMR ( $\text{CDCl}_3$ , 125 MHz):  $\delta$  134.6, 134.1, 132.2, 129.2, 129.0, 128.4, 128.0, 127.6, 126.3, 119.2, 109.4.

### 3. References:

- 1 O. Grossman and D. Gelman, *Org. Lett.*, 2006, **8**, 1189.
- 2 M. Sundermeier, A. Zapf and M. Beller, *Angew. Chem., Int. Ed.*, 2003, **42**, 1661.
- 3 S. Zhou, K. Junge, D. Addis, S. Das and M. Beller, *Org. Lett.*, 2009, **11**, 2461.
- 4 A. V. Ushkov and V. V. Grushin, *J. Am. Chem. Soc.*, 2011, **133**, 10999.
- 5 P. Y. Yeung, C. M. So, C. P. Lau and F. Y. Kwong, *Angew. Chem., Int. Ed.*, 2010, **49**, 8918.

#### 4. Copies of product $^1\text{H}$ NMR and $^{13}\text{C}$ NMR:

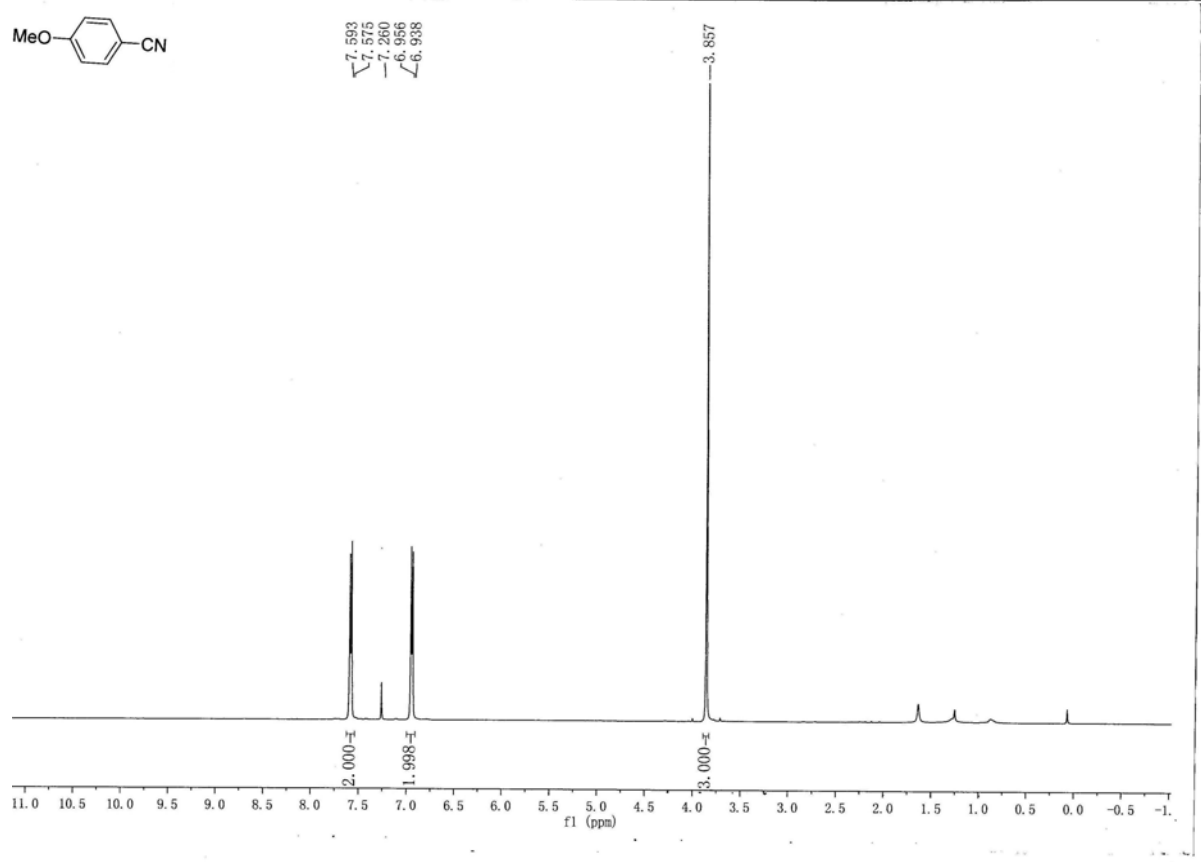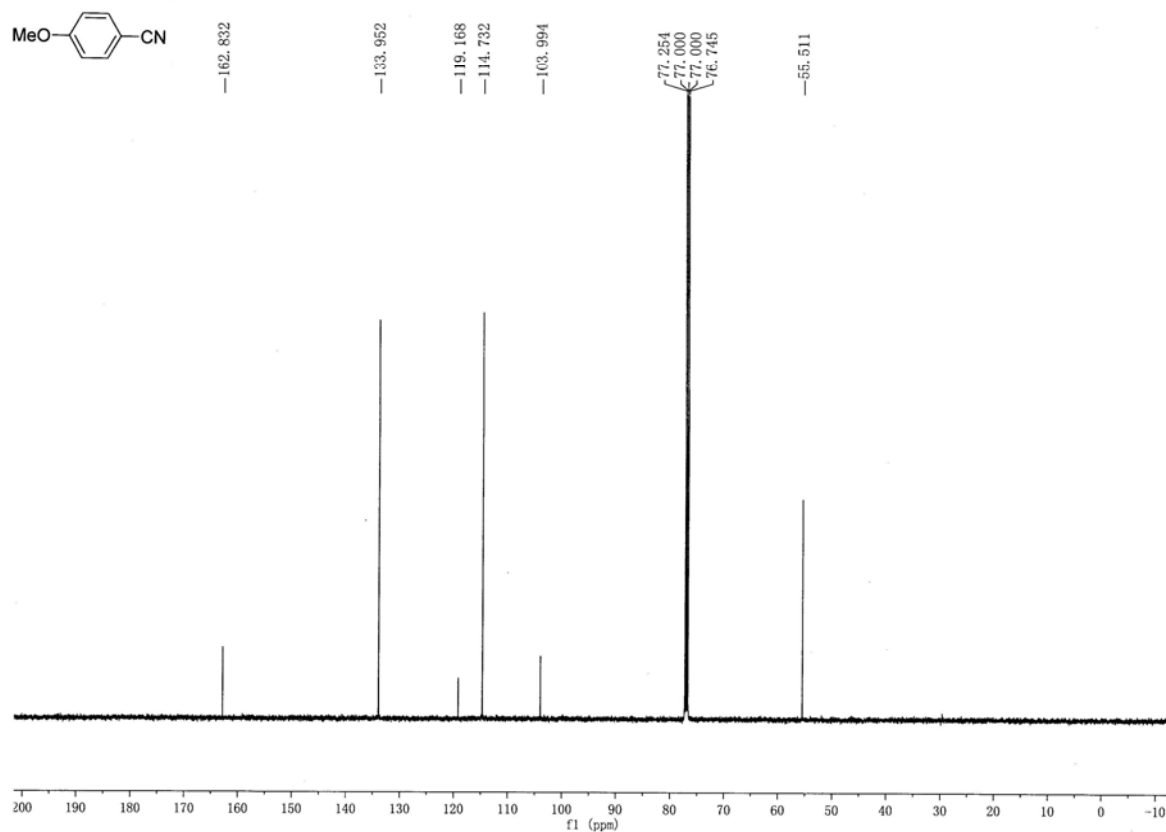

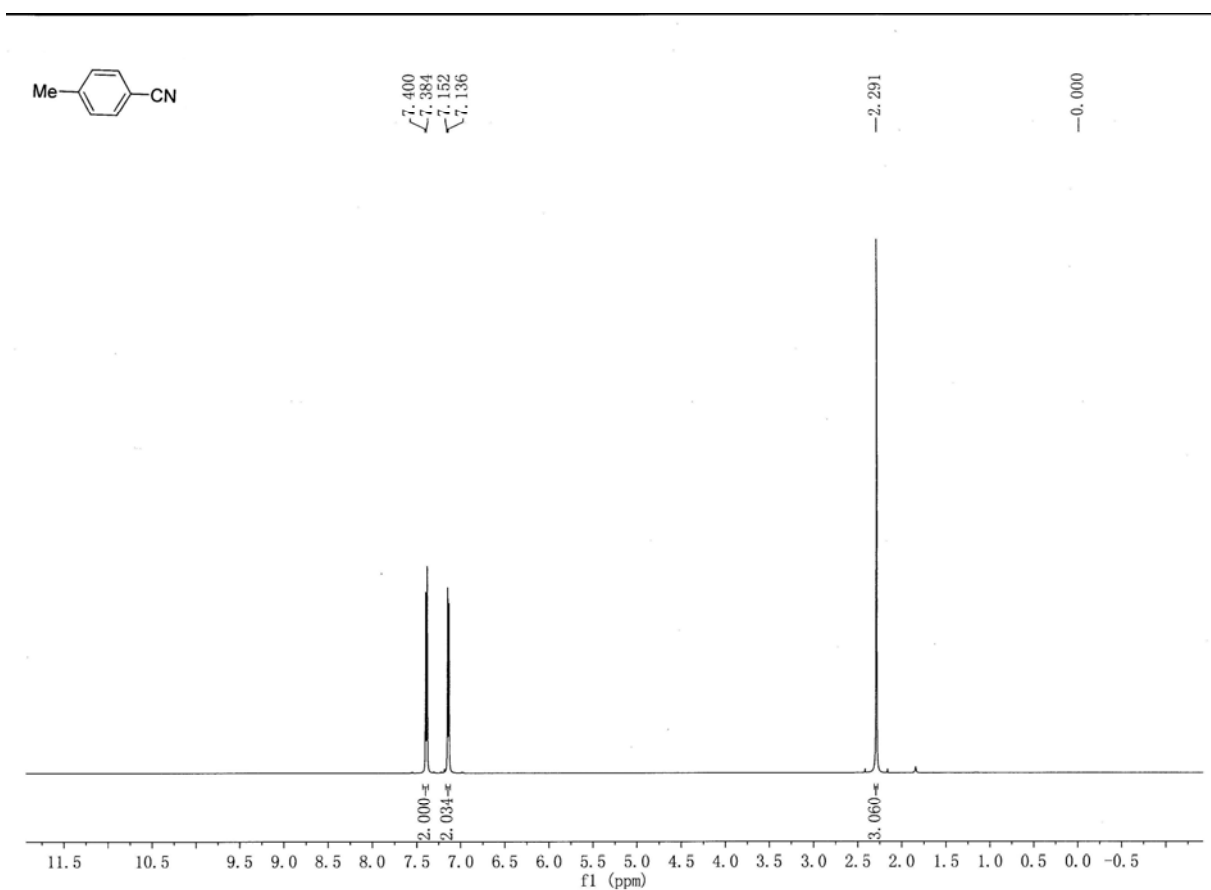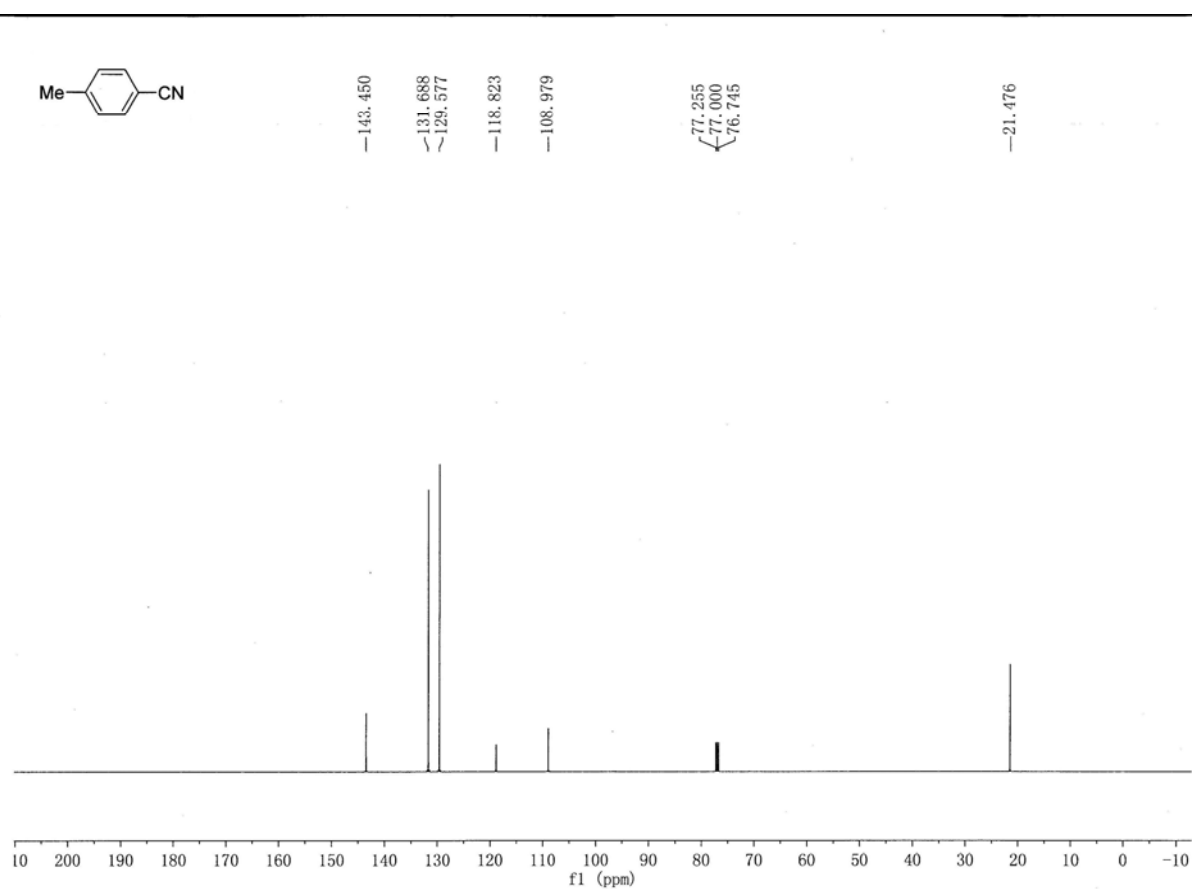

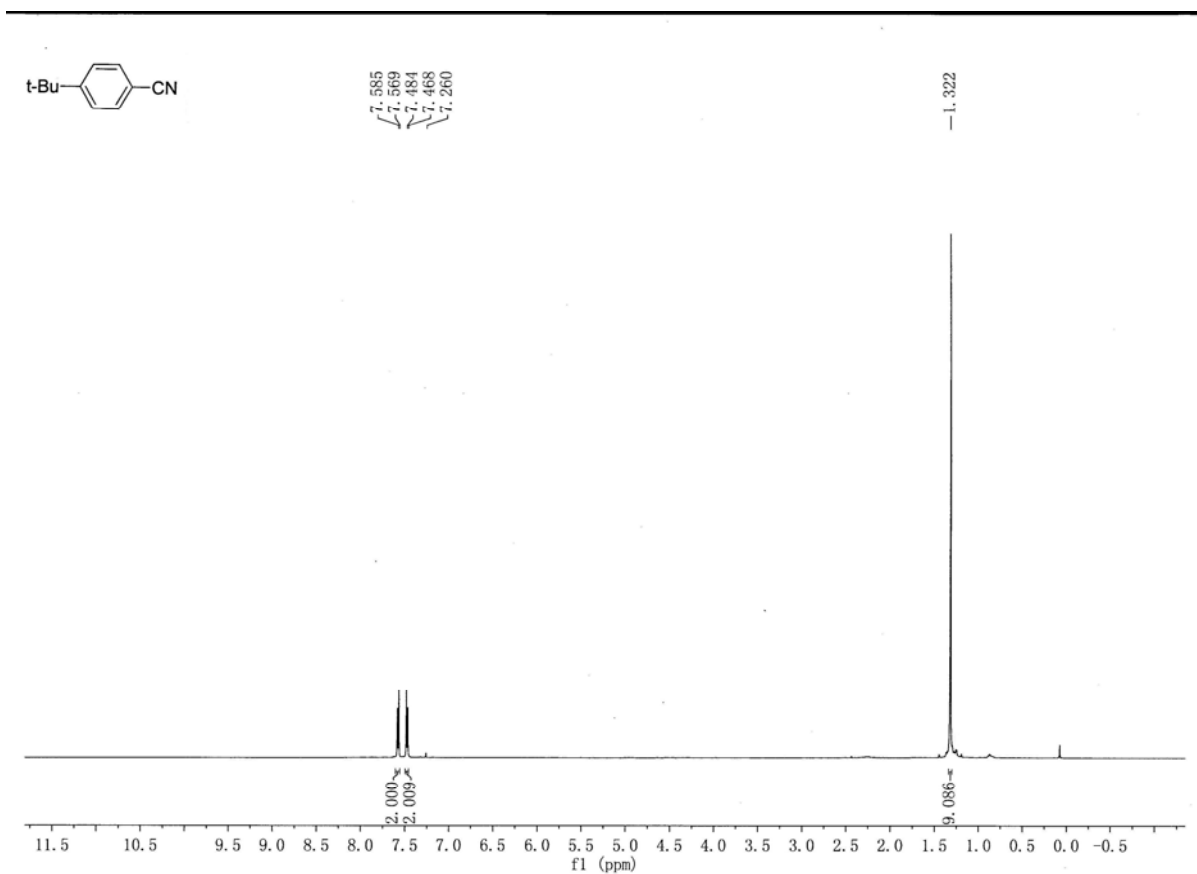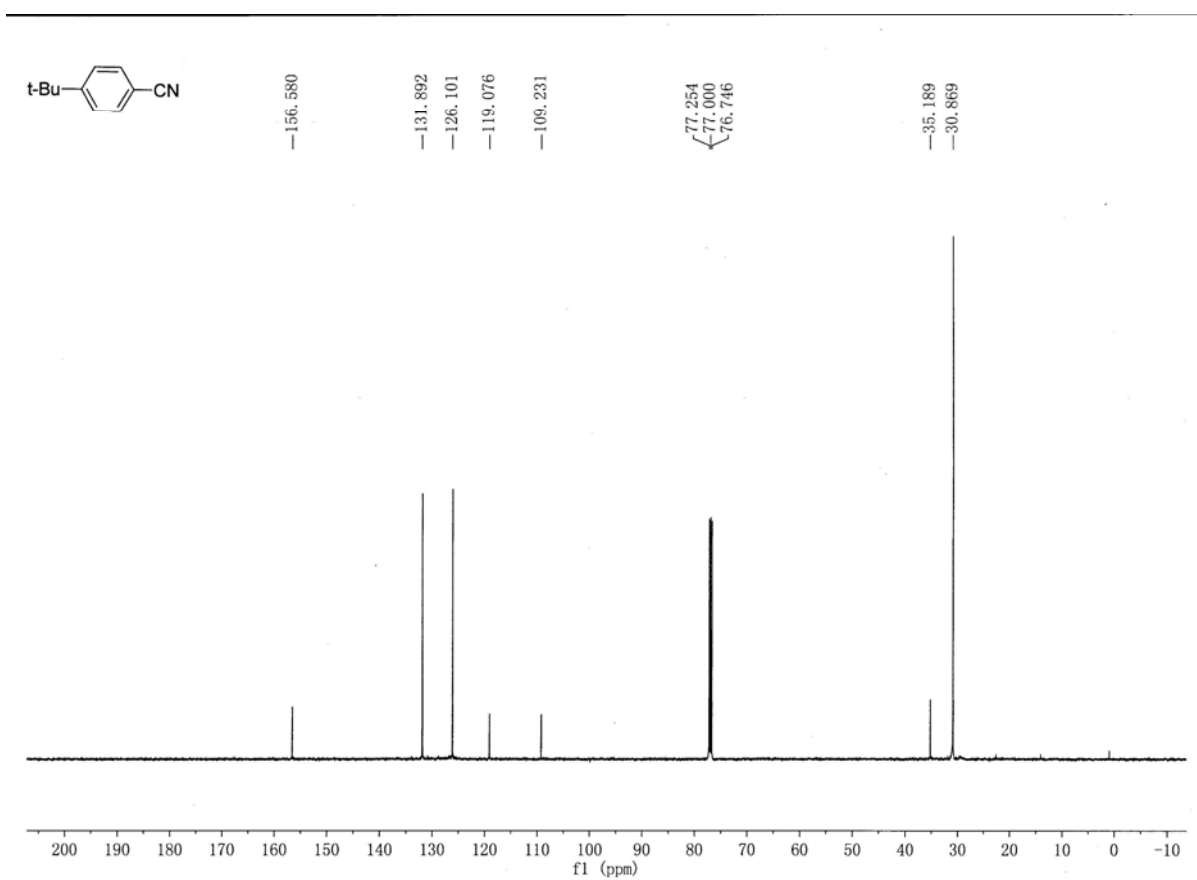



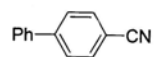

7.735  
7.718  
7.693  
7.676  
7.603  
7.601  
7.586  
7.504  
7.501  
7.490  
7.474  
7.445  
7.435  
7.431  
7.426  
7.416  
7.260

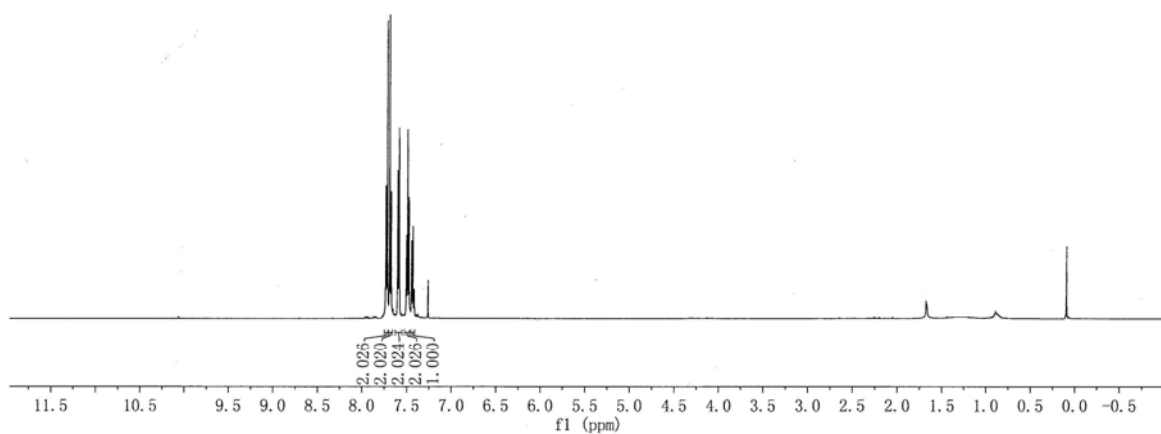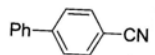

145.626  
139.127  
132.539  
129.062  
128.612  
127.679  
127.175  
118.871  
110.882

77.254  
77.000  
76.746

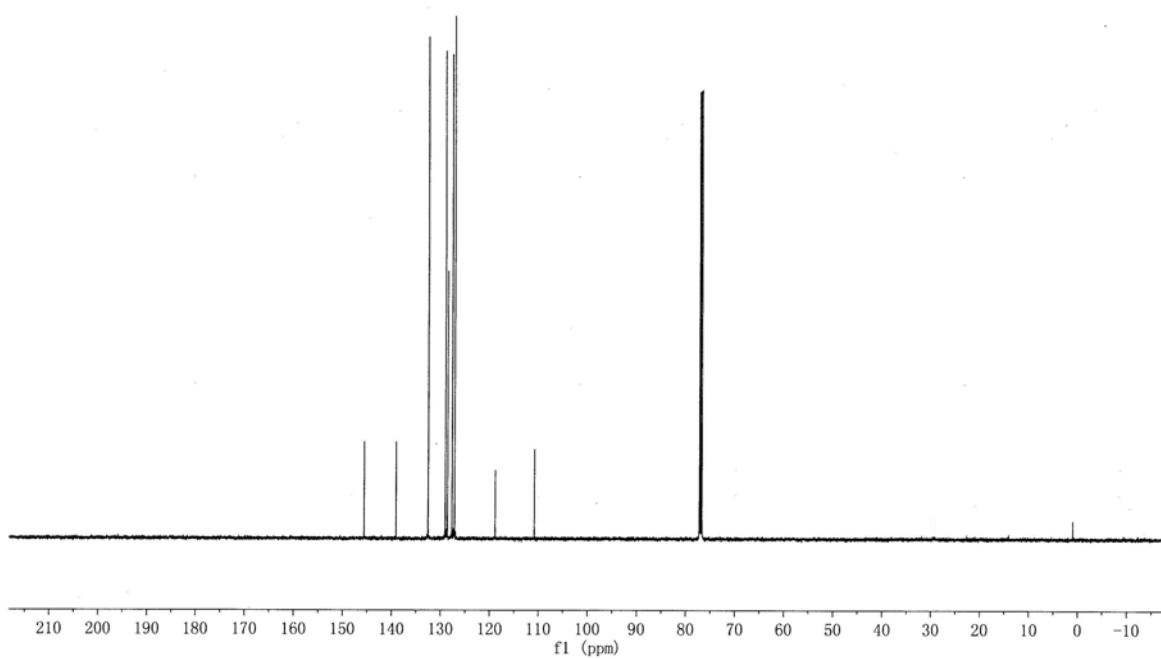

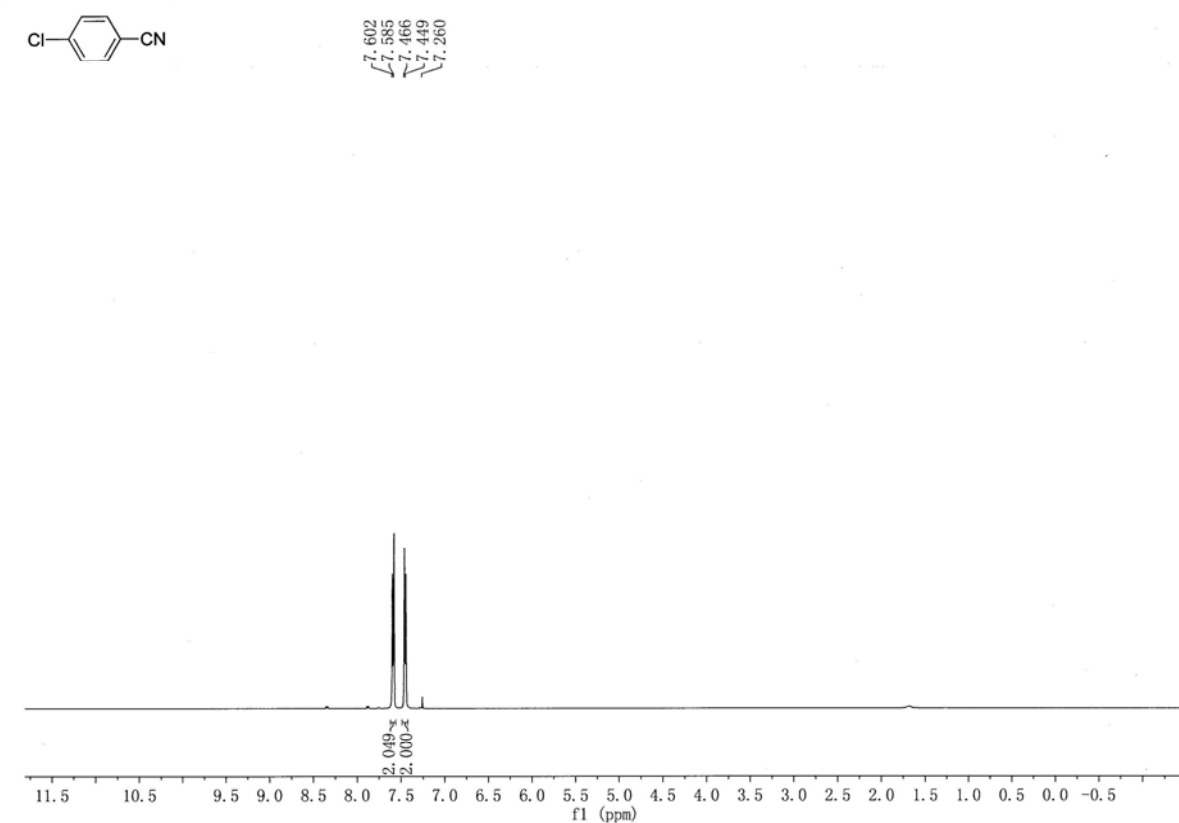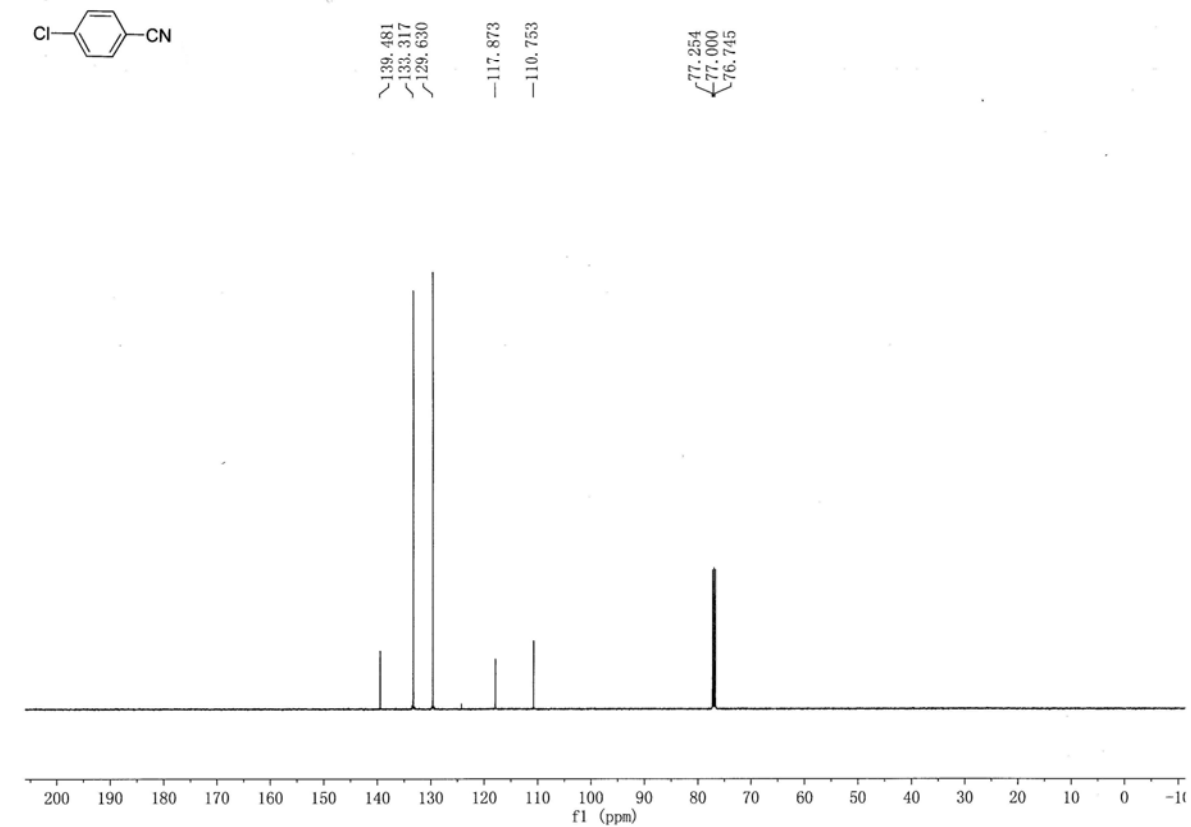

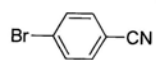

7.625  
7.608  
7.518  
7.501  
7.260

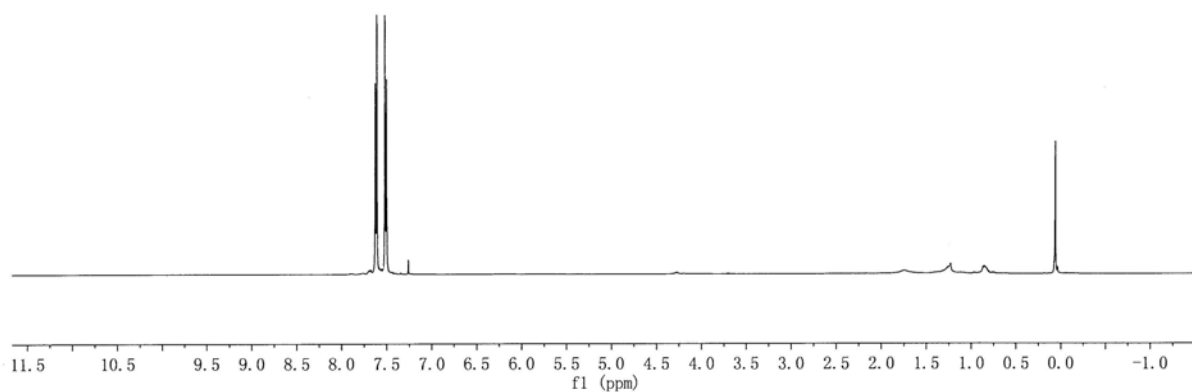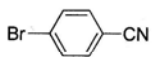

133.313  
132.542  
127.907

117.944  
111.144

77.254  
77.000  
76.746

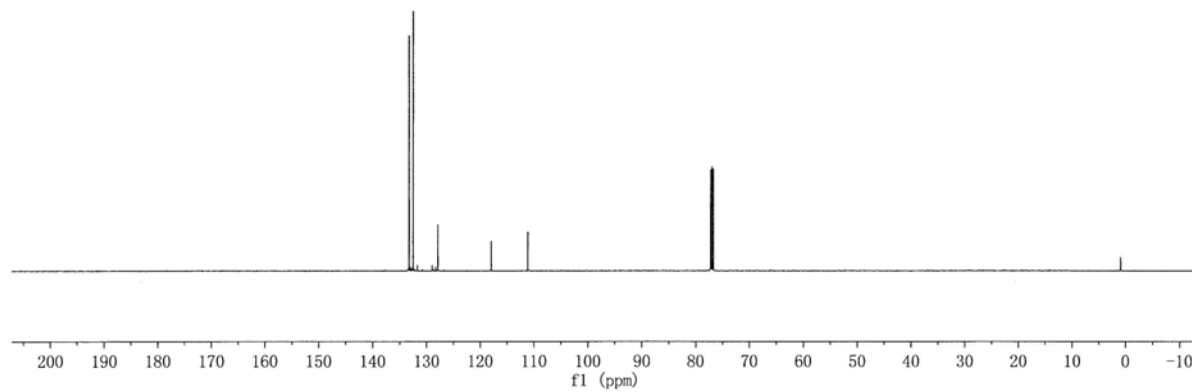

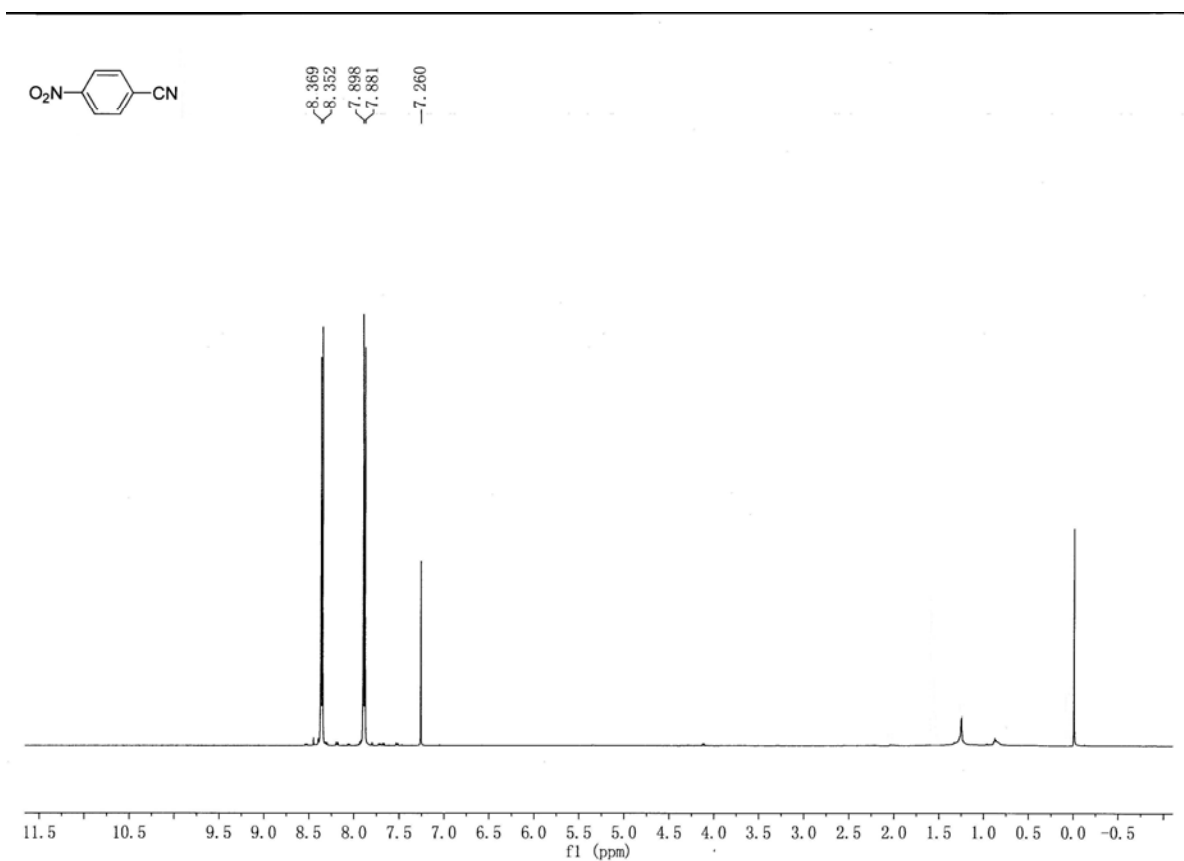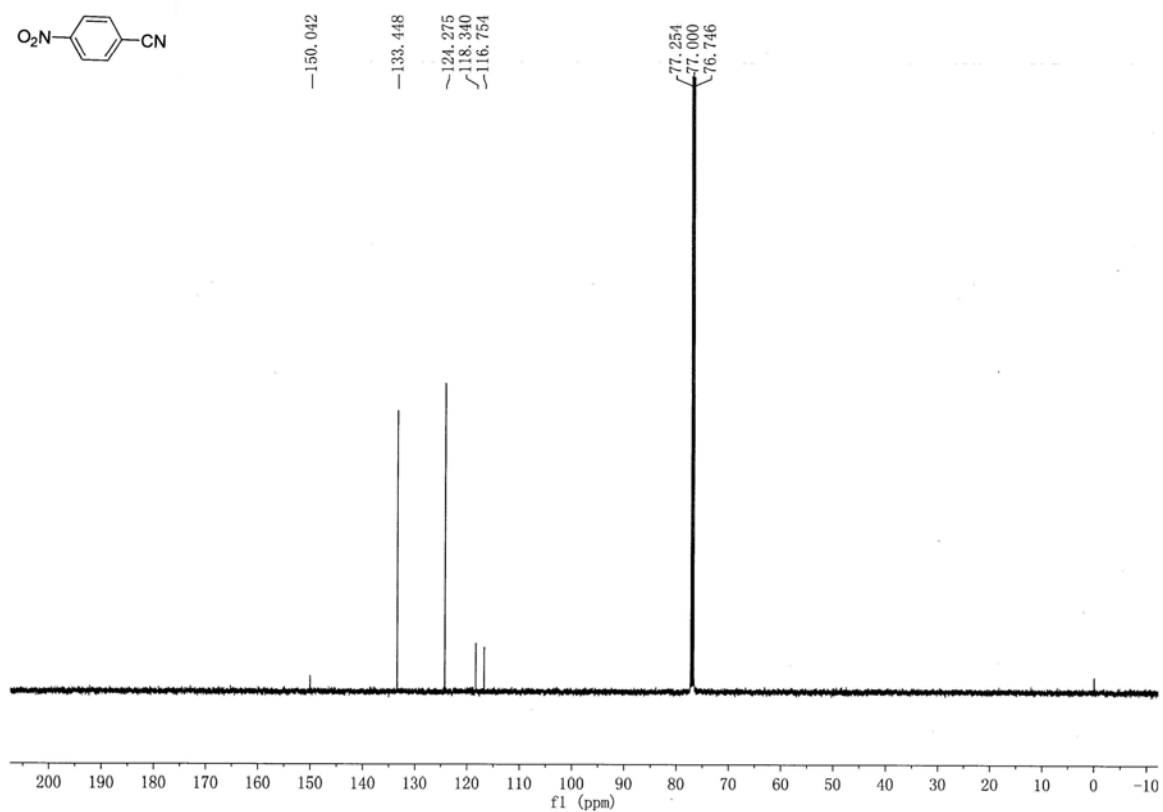

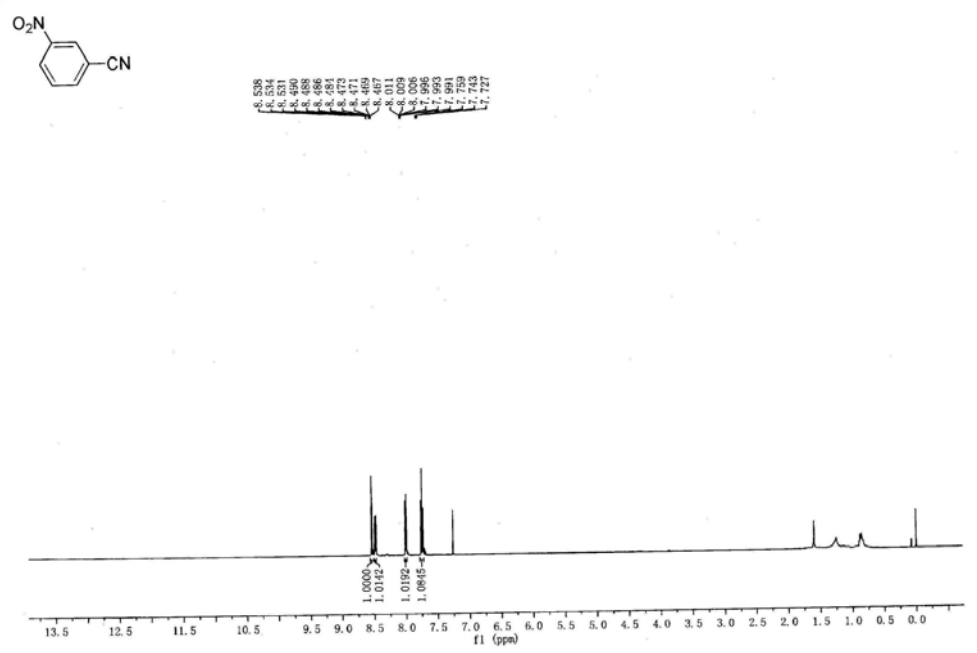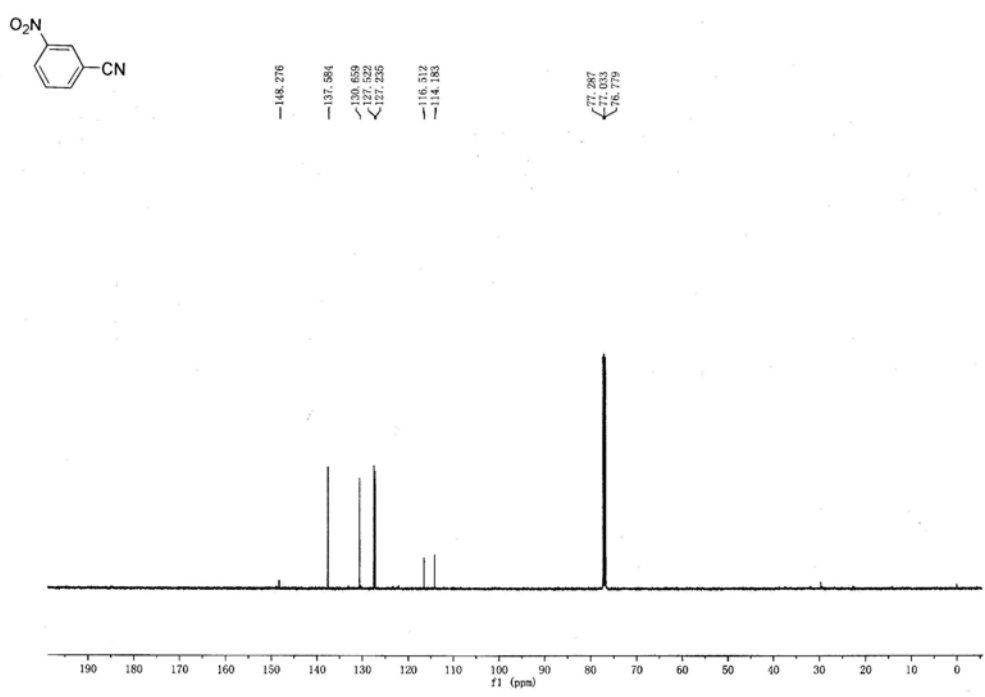

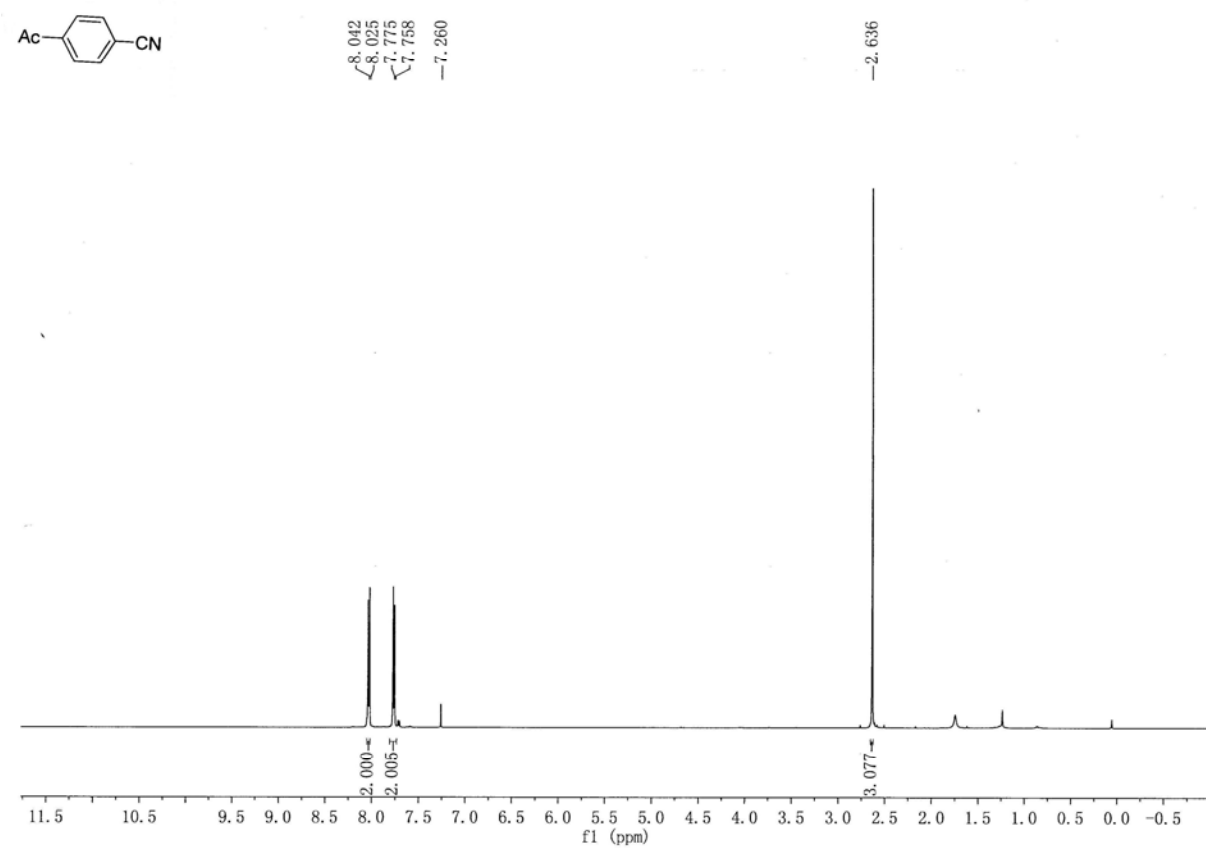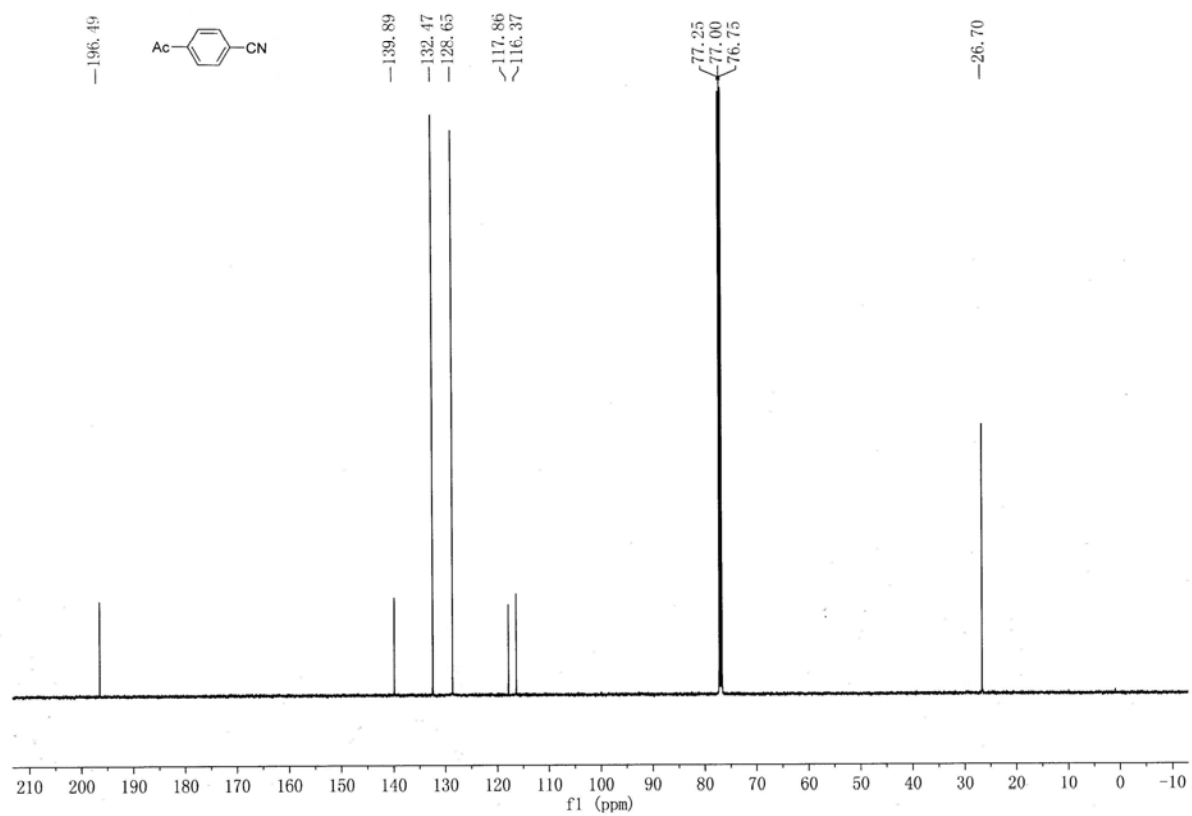

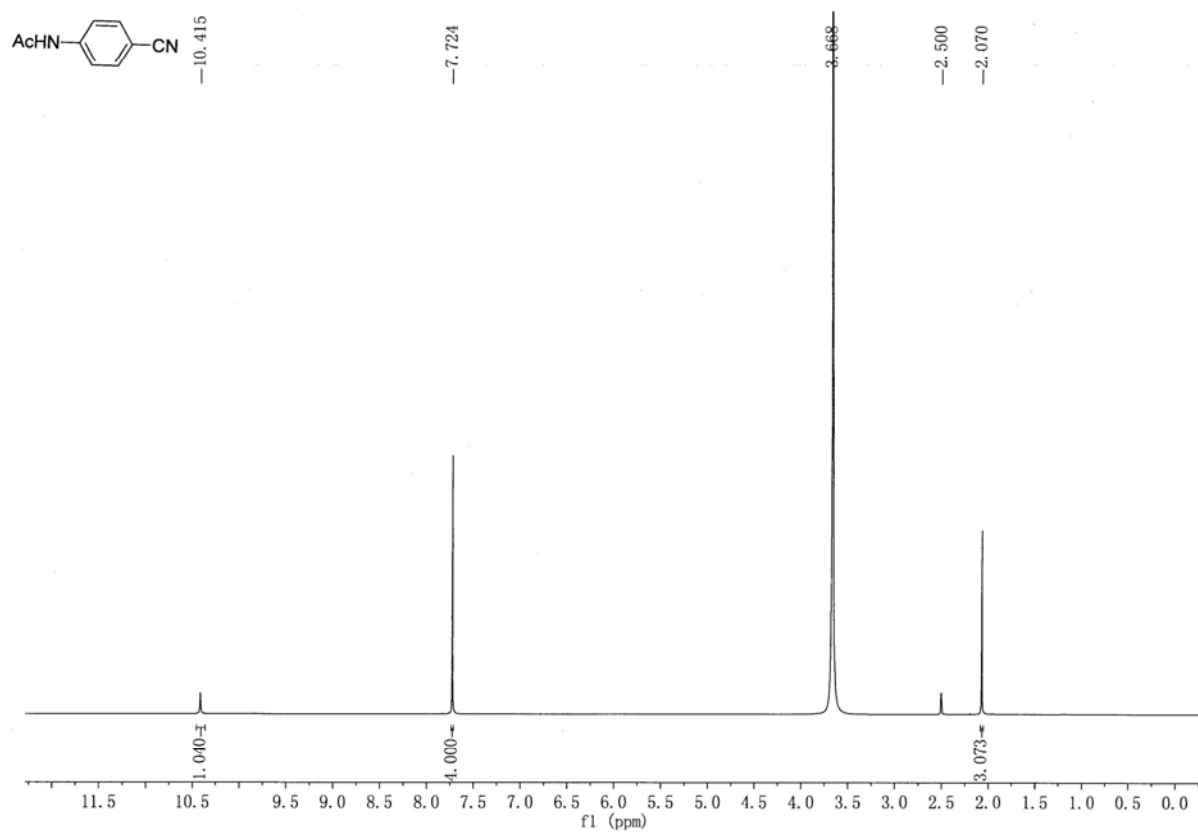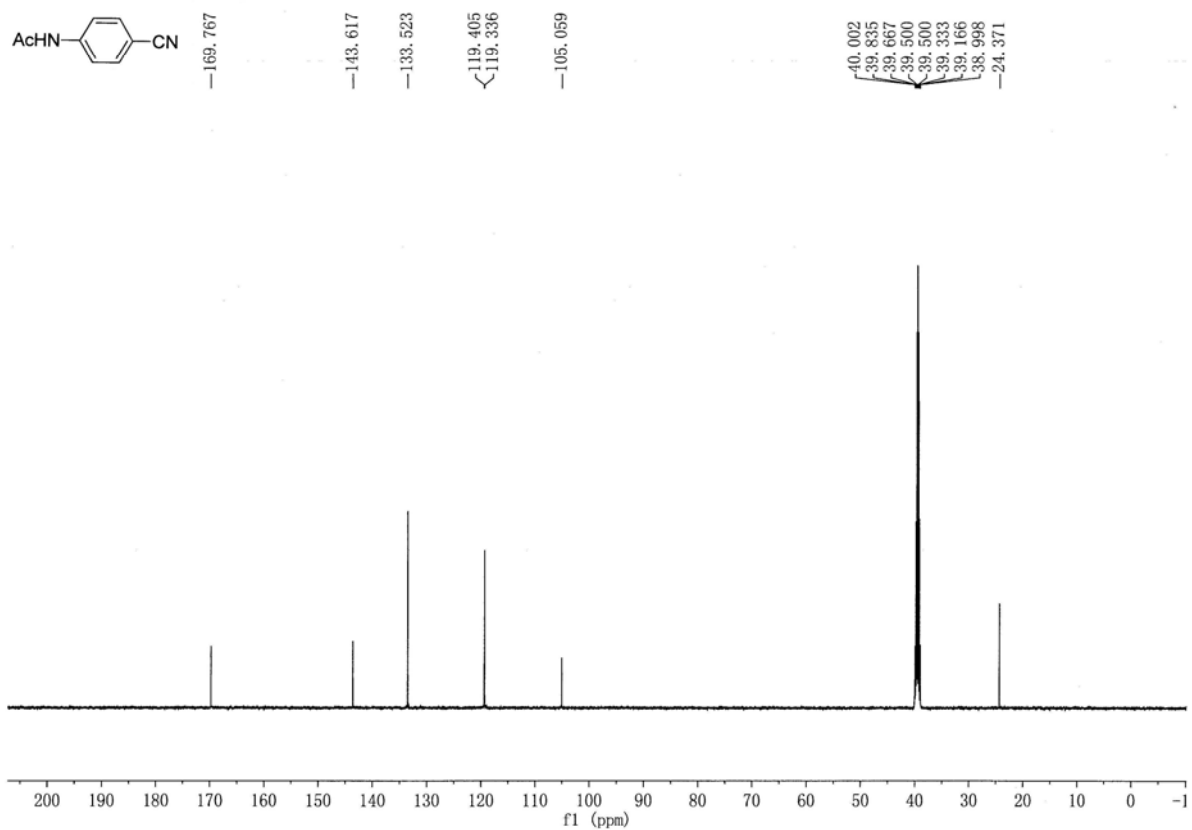

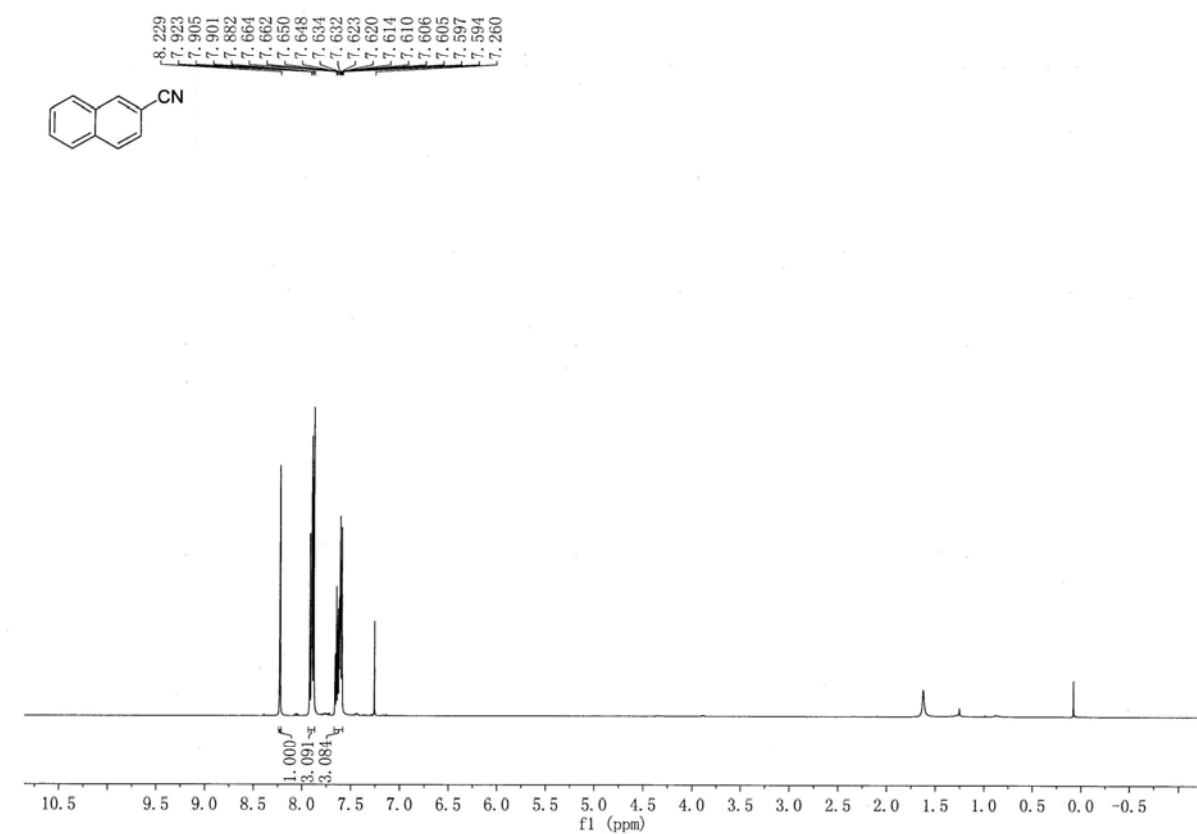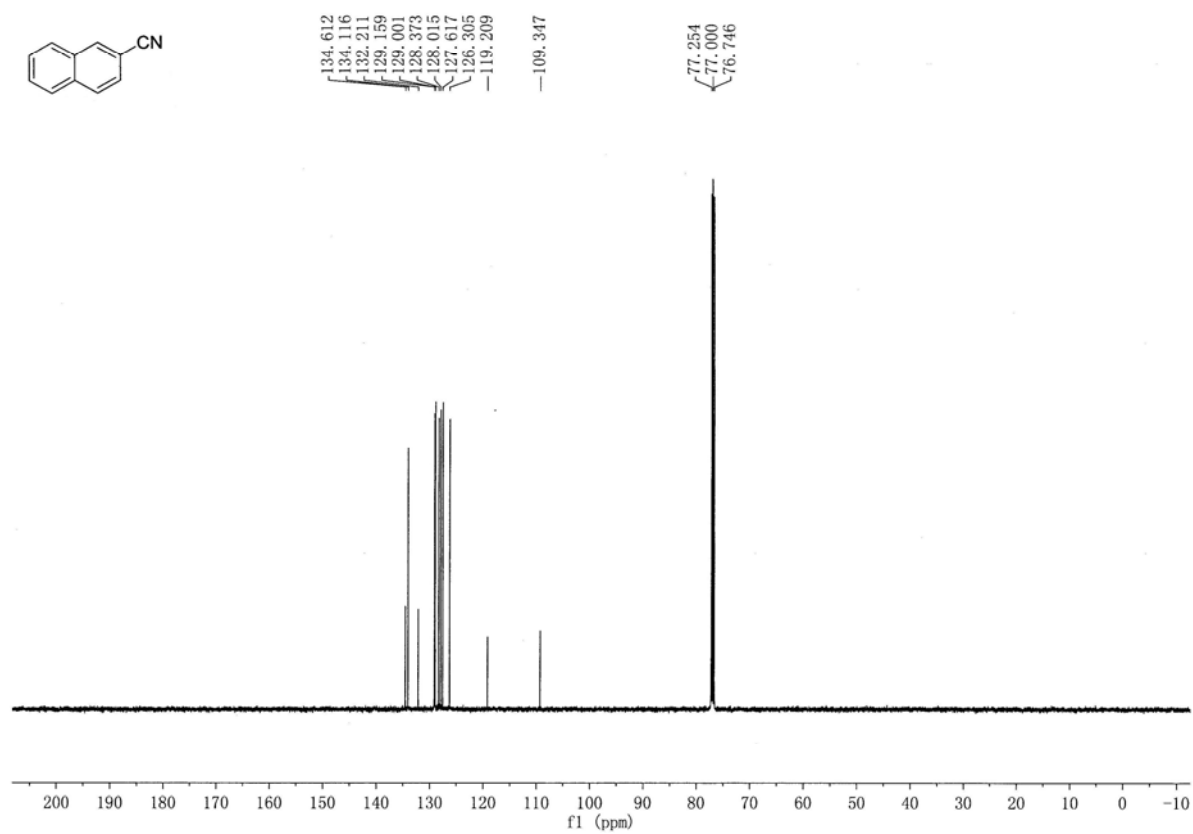

Supplement: c1cc16134b.pdf [file c1cc16134b.pdf]
